# Supplementary material
Source: publisher figshare collection journal article supplement (https://springernature.figshare.com/ndownloader/files/17484416)
Supplement: Supplementary file [file 17484416]

**Table S1:** Disposition of the animals used in this study.

| Group                         | Starting animal number | Animals entered into the study <sup>a</sup> | Animals sacrificed at 3 weeks | Animals sacrificed at 1 year | Initial number of animals for the 2-year end-point | Survival to week 73 <sup>b</sup> | Survival to week 105 | Mean survival time (weeks) |
|-------------------------------|------------------------|---------------------------------------------|-------------------------------|------------------------------|----------------------------------------------------|----------------------------------|----------------------|----------------------------|
| Untreated                     | 30                     | 30                                          | 5                             | 5                            | 20                                                 | 19                               | 15                   | 101.80 ± 2.166             |
| Vehicle                       | 30                     | 30                                          | 5                             | 5                            | 20                                                 | 19                               | 13                   | 100.95 ± 1.858             |
| r-nTiO <sub>2</sub> (0.25 mg) | 30                     | 30                                          | 5                             | 5                            | 20                                                 | 20                               | 14                   | 102.60 ± 1.003             |
| r-nTiO <sub>2</sub> (0.50 mg) | 30                     | 29                                          | 5                             | 5                            | 19                                                 | 19                               | 17                   | 104.16 ± 0.637             |
| POT (0.25 mg)                 | 30                     | 28                                          | 5                             | 5                            | 18                                                 | 17                               | 9                    | 99.89 ± 2.289              |
| POT (0.50 mg)                 | 30                     | 29                                          | 5                             | 5                            | 19                                                 | 16                               | 11                   | 92.89 ± 4.098              |
| MWCNT-7 (0.50 mg)             | 30                     | 30                                          | 5                             | 5                            | 20                                                 | 14                               | 8                    | 87.73 ± 4.635*             |

<sup>a</sup> Four rats died during TIPS administration: 1 rat in the 0.50 mg r-nTiO<sub>2</sub> group, 2 rats in the 0.25 POT group, and 1 rat in the 0.50 mg POT group.

<sup>b</sup> Prior to the first treatment-related death at week 73, an additional 12 rats died from non-treatment related causes. These 12 rats were excluded from the study.

\* Different from the Vehicle Control at p<0.05.

**Table S2:** Non-treatment-related deaths prior to week 73.

| Group                         | Animal number | Cause of Death                                                                                                                                                                                           |
|-------------------------------|---------------|----------------------------------------------------------------------------------------------------------------------------------------------------------------------------------------------------------|
| Untreated                     | 1             | Leukemia (day 426)                                                                                                                                                                                       |
| Vehicle                       | 1             | Food clogging (day 478)                                                                                                                                                                                  |
| r-nTiO <sub>2</sub> (0.25 mg) | 0             |                                                                                                                                                                                                          |
| r-nTiO <sub>2</sub> (0.50 mg) | 1             | Died during TIPS administration of the test material.                                                                                                                                                    |
| POT (0.25 mg)                 | 3             | 2 rats died during TIPS administration of the test material.<br>1 rat died due to food clogging (day 481).                                                                                               |
| POT (0.50 mg)                 | 4             | 1 rat died during TIPS administration of the test material.<br>1 rat died from urethral obstruction (day 334).<br>1 rat died from a skin fibroma (day 350).<br>1 rat died from unknown causes (day 407). |
| MWCNT-7 (0.50 mg)             | 6             | 1 rat died from a brain tumor (day 304).<br>1 rat died from leukemia (day 463).<br>4 rats died due to food clogging (days 372, 414, 465, 484).                                                           |

**Table S3:** Final body weights.

| Group                         | Animals Surviving to week 105 | Body weights at week 105 |
|-------------------------------|-------------------------------|--------------------------|
| Untreated                     | 15                            | 448.3 ± 23.3             |
| Vehicle                       | 13                            | 427.4 ± 25.4*            |
| r-nTiO <sub>2</sub> (0.25 mg) | 14                            | 425.7 ± 24.5             |
| r-nTiO <sub>2</sub> (0.50 mg) | 17                            | 437.8 ± 55.5             |
| POT (0.25 mg)                 | 9                             | 447.1 ± 23.7             |
| POT (0.50 mg)                 | 11                            | 413.1 ± 36.1             |
| MWCNT-7 (0.50 mg)             | 8                             | 407.1 ± 25.8             |

\* Different from the Vehicle Control at p<0.05.

**Table S4:** Neoplastic lesions found in individual rats.

| Group                         | Animals<br>with<br>tumors | Lung<br>Tumors                     | Pleural<br>Mesotheliomas | Time of Death |
|-------------------------------|---------------------------|------------------------------------|--------------------------|---------------|
| Untreated                     | 3                         | Bronchiolo-alveolar adenocarcinoma |                          | TS (week 105) |
|                               |                           | Bronchiolo-alveolar adenocarcinoma |                          | TS (week 105) |
|                               |                           | Bronchiolo-alveolar adenocarcinoma |                          | TS (week 105) |
| Vehicle                       | 1                         | Bronchiolo-alveolar adenoma        |                          | TS (week 105) |
| r-nTiO <sub>2</sub> (0.25 mg) | 2                         | Bronchiolo-alveolar adenoma        |                          | TS (week 105) |
|                               |                           | Bronchiolo-alveolar adenoma        |                          | TS (week 105) |
| r-nTiO <sub>2</sub> (0.50 mg) | 2                         | Bronchiolo-alveolar adenoma        |                          | TS (week 105) |
|                               |                           | Bronchiolo-alveolar adenoma        |                          | TS (week 105) |
| POT (0.25 mg)                 | 4                         | Bronchiolo-alveolar adenoma        | Visceral mesothelioma    | MS (week 94)  |
|                               |                           | Squamous cell carcinoma            |                          | TS (week 105) |
|                               |                           |                                    | Parietal mesothelioma    | MS (week 98)  |
|                               |                           |                                    | Parietal mesothelioma    | TS (week 105) |
| POT (0.50 mg)                 | 2                         | Bronchiolo-alveolar adenocarcinoma |                          | TS (week 105) |
|                               |                           | Bronchiolo-alveolar adenocarcinoma | Parietal mesothelioma    | FD (week 75)  |
| MWCNT-7 (0.50 mg)             | 7                         | Bronchiolo-alveolar adenoma        |                          | TS (week 105) |
|                               |                           | Bronchiolo-alveolar adenocarcinoma |                          | FD (week 73)  |
|                               |                           | Bronchiolo-alveolar adenocarcinoma |                          | FD (week 92)  |
|                               |                           | Bronchiolo-alveolar adenocarcinoma |                          | TS (week 105) |
|                               |                           | Bronchiolo-alveolar adenocarcinoma |                          | TS (week 105) |
|                               |                           | Bronchiolo-alveolar adenocarcinoma | Parietal mesothelioma    | MS (week 91)  |
|                               |                           |                                    | Parietal mesothelioma    | FD (week 92)  |

TS: Terminal sacrifice  
MS: Moribund sacrifice  
FD: Found dead

**Table S5:** Incidence of other tumors.

| Group                         | Animals examined | Leydig cell tumors | Leukemia/ Lymphoma | Subcutaneous fibroma | Preputial gland tumors | Pituitary tumors | Other                                                                                                                                                   |
|-------------------------------|------------------|--------------------|--------------------|----------------------|------------------------|------------------|---------------------------------------------------------------------------------------------------------------------------------------------------------|
| Untreated                     | 19               | 10                 | 1                  | 2                    | 5                      | 0                | Renal cortex adenoma (1)                                                                                                                                |
| Vehicle                       | 19               | 11                 | 1                  | 3                    | 1                      | 4                |                                                                                                                                                         |
| r-nTiO <sub>2</sub> (0.25 mg) | 20               | 11                 | 1                  | 3                    | 6                      | 2                | Oligodendroglioma (1)                                                                                                                                   |
| r-nTiO <sub>2</sub> (0.50 mg) | 19               | 12                 | 1                  | 3                    | 3                      | 3                | Undifferentiated pancreatic carcinoma (1)                                                                                                               |
| POT (0.25 mg)                 | 17               | 8                  | 2                  | 4                    | 2                      | 2                | Renal cortex adenocarcinoma (1)<br>Undifferentiated pancreatic carcinoma (1)<br>Diaphragmatic carcinoma (1)<br>Nasal cavity squamous cell carcinoma (1) |
| POT (0.50 mg)                 | 16               | 7                  | 0                  | 3                    | 1                      | 2                | Undifferentiated pancreatic carcinoma (1)<br>Nasal cavity squamous cell carcinoma (2)                                                                   |
| MWCNT-7 (0.50 mg)             | 14               | 8                  | 2                  | 2                    | 2                      | 2                | Anaplastic Meningeal sarcoma (1)                                                                                                                        |

**Table S6:** Absolute organ weights (grams).

| Group                         | Animals<br>examined | Lungs                    | Brain       | Heart       | Liver                     | Kidneys                  | Spleen      |
|-------------------------------|---------------------|--------------------------|-------------|-------------|---------------------------|--------------------------|-------------|
| Untreated                     | 15                  | 1.36 ± 0.10              | 2.15 ± 0.03 | 1.16 ± 0.06 | 14.52 ± 0.85              | 2.99 ± 0.20              | 1.11 ± 0.36 |
| Vehicle                       | 13                  | 1.30 ± 0.07              | 2.13 ± 0.06 | 1.12 ± 0.08 | 13.54 ± 1.42 <sup>#</sup> | 2.84 ± 0.23              | 0.94 ± 0.14 |
| r-nTiO <sub>2</sub> (0.25 mg) | 14                  | 1.36 ± 0.08              | 2.15 ± 0.02 | 1.15 ± 0.10 | 13.97 ± 1.47              | 2.95 ± 0.19              | 1.11 ± 0.22 |
| r-nTiO <sub>2</sub> (0.50 mg) | 17                  | 1.34 ± 0.06              | 2.13 ± 0.04 | 1.16 ± 0.12 | 14.12 ± 1.70              | 3.00 ± 0.23              | 1.13 ± 0.36 |
| POT (0.25 mg)                 | 9                   | 1.35 ± 0.07 <sup>a</sup> | 2.11 ± 0.05 | 1.15 ± 0.13 | 14.68 ± 1.97              | 3.05 ± 0.49 <sup>a</sup> | 1.13 ± 0.25 |
| POT (0.50 mg)                 | 11                  | 1.35 ± 0.09              | 2.13 ± 0.03 | 1.10 ± 0.05 | 13.47 ± 2.11              | 2.83 ± 0.11              | 1.08 ± 0.44 |
| MWCNT-7 (0.50 mg)             | 8                   | 1.94 ± 0.73 <sup>*</sup> | 2.16 ± 0.04 | 1.16 ± 0.07 | 14.89 ± 2.05              | 2.99 ± 0.23              | 2.45 ± 2.84 |

\* : Significantly different from vehicle group at p < 0.05.

# : Significantly different from untreated group at p < 0.05.

a : n=8, one organ was omitted.

**Table S7:** Relative organ weights (expressed as percent body weight).

| Group                         | Animals<br>examined | Lungs                    | Brain                    | Heart                    | Liver                     | Kidneys                  | Spleen      |
|-------------------------------|---------------------|--------------------------|--------------------------|--------------------------|---------------------------|--------------------------|-------------|
| Untreated                     | 15                  | 0.31 ± 0.03              | 0.48 ± 0.03              | 0.26 ± 0.02              | 3.24 ± 0.18               | 0.67 ± 0.05              | 0.25 ± 0.09 |
| Vehicle                       | 13                  | 0.31 ± 0.02              | 0.50 ± 0.03              | 0.26 ± 0.02              | 3.17 ± 0.31               | 0.67 ± 0.06              | 0.22 ± 0.03 |
| r-nTiO <sub>2</sub> (0.25 mg) | 14                  | 0.32 ± 0.03              | 0.51 ± 0.03              | 0.27 ± 0.03              | 3.28 ± 0.31               | 0.69 ± 0.04              | 0.26 ± 0.06 |
| r-nTiO <sub>2</sub> (0.50 mg) | 17                  | 0.31 ± 0.03              | 0.49 ± 0.05              | 0.27 ± 0.02              | 3.25 ± 0.37               | 0.69 ± 0.08              | 0.26 ± 0.08 |
| POT (0.25 mg)                 | 9                   | 0.30 ± 0.02 <sup>a</sup> | 0.47 ± 0.02              | 0.26 ± 0.03              | 3.28 ± 0.40               | 0.68 ± 0.11 <sup>a</sup> | 0.25 ± 0.06 |
| POT (0.50 mg)                 | 11                  | 0.33 ± 0.04              | 0.52 ± 0.05              | 0.27 ± 0.02              | 3.27 ± 0.51               | 0.69 ± 0.07              | 0.26 ± 0.11 |
| MWCNT-7 (0.50 mg)             | 8                   | 0.48 ± 0.19 <sup>*</sup> | 0.53 ± 0.03 <sup>*</sup> | 0.28 ± 0.02 <sup>*</sup> | 3.66 ± 0.45 <sup>**</sup> | 0.74 ± 0.05 <sup>*</sup> | 0.61 ± 0.72 |

\* : Significantly different from vehicle group at p < 0.05.

a : n=8, one organ was omitted.

**Table S8.** Non-neoplastic lesions in the lung and pleura .

| Group                                        | Untreated | Vehicle | r-nTiO <sub>2</sub><br>0.25 mg | r-nTiO <sub>2</sub><br>0.50 mg | POT<br>0.25 mg | POT<br>0.50 mg    | MWCNT-7<br>0.50 mg |
|----------------------------------------------|-----------|---------|--------------------------------|--------------------------------|----------------|-------------------|--------------------|
| Number of animals                            | 19        | 19      | 20                             | 19                             | 17             | 16                | 14                 |
| Alveolar type II epithelial cell hyperplasia | 2         | 2       | 0                              | 2                              | 7              | 10 <sup>**</sup>  | 14 <sup>***</sup>  |
| Bronchiolar hyperplasia                      | 0         | 0       | 0                              | 0                              | 0              | 0                 | 3                  |
| Alveolar macrophages <sup>a</sup>            | 0         | 0       | 0                              | 0                              | 4 <sup>*</sup> | 13 <sup>***</sup> | 14 <sup>**</sup>   |
| Focal fibrosis in the lung                   | 0         | 0       | 0                              | 0                              | 4 <sup>*</sup> | 10 <sup>***</sup> | 14 <sup>***</sup>  |
| Granulomatous change in the lung             | 0         | 0       | 0                              | 0                              | 0              | 0                 | 14 <sup>***</sup>  |
| Mesothelial cell hyperplasia                 | 0         | 0       | 0                              | 0                              | 4 <sup>*</sup> | 7 <sup>**</sup>   | 10 <sup>***</sup>  |

<sup>a</sup>

Alveolar macrophages were scored as +, ++, +++. The numbers of rats with scores of ++ and +++ are shown.

\*\*\*\*\* Different from both the Untreated and the Vehicle Control at p<0.05, p<0.01, p<0.001, respectively.

**Table S9:** LDH and Total Protein found in the pleural lavage fluid of individual rats.

| Group                         | Tumor                       | LDH (U/L) | Total protein (µg/ml) |
|-------------------------------|-----------------------------|-----------|-----------------------|
| Untreated                     |                             | 5.12      | 292.79                |
|                               |                             | 5.38      | 335.62                |
|                               |                             | 8.00      | 351.13                |
|                               |                             | 8.69      | 310.83                |
|                               |                             | 9.46      | 359.14                |
| Vehicle                       |                             | 4.90      | 430.76                |
|                               |                             | 5.23      | 375.98                |
|                               |                             | 7.39      | 266.13                |
|                               |                             | 8.18      | 292.12                |
|                               |                             | 13.74     | 537.92                |
| r-nTiO <sub>2</sub> (0.25 mg) | Bronchiolo-alveolar adenoma | 3.89      | 215.04                |
|                               |                             | 5.10      | 373.28                |
|                               |                             | 5.95      | 332.94                |
|                               |                             | 11.33     | 475.65                |
|                               |                             | 14.78     | 3234.02               |
| r-nTiO <sub>2</sub> (0.50 mg) |                             | 5.22      | 275.45                |
|                               |                             | 5.77      | 343.68                |
|                               |                             | 6.21      | 331.60                |
|                               |                             | 6.96      | 155.07                |
|                               |                             | 11.15     | 842.98                |
| POT (0.25 mg)                 |                             | 4.37      | 66.26                 |
|                               |                             | 5.01      | 104.01                |
|                               |                             | 5.14      | 914.28                |
|                               |                             | 5.64      | 400.28                |
|                               |                             | 16.74     | 1112.18               |
| POT (0.50 mg)                 |                             | 5.53      | 238.22                |
|                               |                             | 6.18      | 351.07                |
|                               |                             | 6.64      | 375.98                |
|                               |                             | 6.76      | 409.07                |
|                               |                             | 6.77      | 231.59                |
| MWCNT-7 (0.50 mg)             |                             | 5.96      | 324.89                |
|                               |                             | 7.39      | 360.49                |
|                               |                             | 7.50      | 321.54                |
|                               |                             | 7.59      | 660.98                |
|                               |                             | 10.66     | 2726.85               |
